# Supplementary material
Source: ML conference proceedings conference paper supplement (https://aclanthology.org/2026.semeval-1.225)

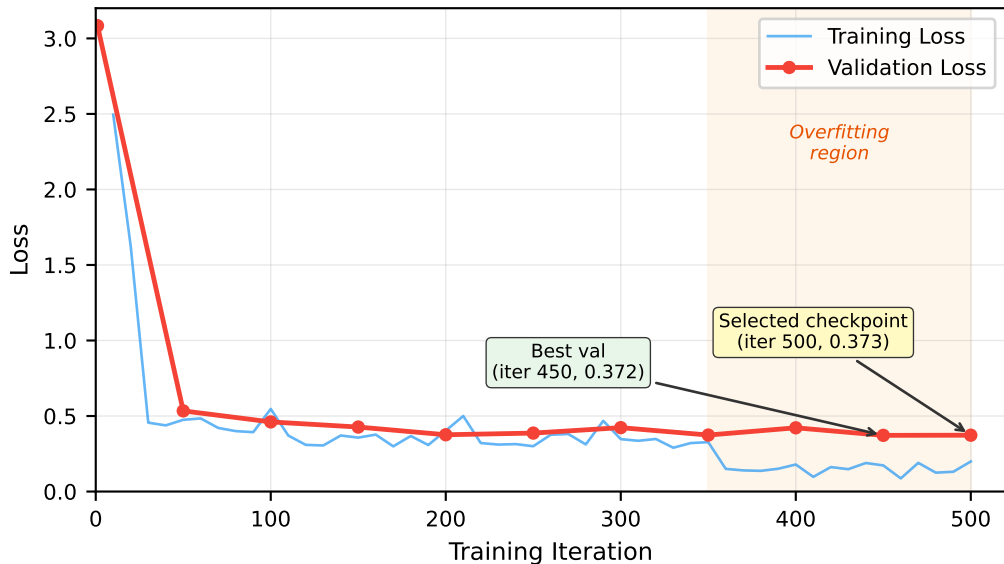

Supplement: SupplementaryMaterial [file training_curve.pdf › final_submission/figures/training_curve.pdf]
